# Supplementary material
Source: PubMed Central journal article supplement (PMC2435684)
Supplement: blood-2007-08-107847_1.pdf [file blood-2007-08-107847_1.pdf]

| <b>Receptor</b>       | <b>Wild Type %<sup>a</sup></b> | <b>BCAP<sup>-/-</sup> %<sup>a</sup></b> |
|-----------------------|--------------------------------|-----------------------------------------|
| DX5 <sup>High</sup>   | 87.8 ± 1.6                     | 94.9 ± 1.0                              |
| CD11b <sup>High</sup> | 67.3 ± 3.1                     | 72.8 ± 5.5                              |
| CD94 <sup>Low</sup>   | 58.9 ± 4.2                     | 64.4 ± 0.8                              |
| CD43 <sup>High</sup>  | 83.3 ± 5.0                     | 91.7 ± 0.2                              |
| CD27 <sup>Low</sup>   | 62.7 ± 2.6                     | 67.7 ± 1.4                              |
| KLRG1+                | 59.5 ± 11.9                    | 59.1 ± 7.6                              |
| Ly49A+                | 15.4 ± 4.5                     | 10.1 ± 2.0                              |
| Ly49F+                | 6.0 ± 2.8                      | 3.0 ± 0.4                               |
| Ly49G2+               | 46.8 ± 3.7                     | 36.3 ± 3.9                              |
| NKG2A+                | 37.6 ± 5.4                     | 34.7 ± 2.0                              |
| Ly49I+                | 55.5 ± 7.0                     | 58.0 ± 2.5                              |
| Ly49D+                | 49.8 ± 1.0                     | 47.5 ± 1.7                              |

<sup>a</sup> Values represent the means and ± S.D. from at least 3 mice.
